# Supplementary material
Source: HighWire-hosted journal article supplement (http://www.qdcxjkg.com/highwire/filestream/114656/field_highwire_adjunct_files/0/ERJ-00708-2012-CORRE.pdf)
Supplement: ERJ-00708-2012-CORRE.pdf [file ERJ-00708-2012-CORRE.pdf]

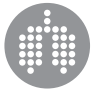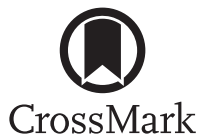

**“Contact investigation for tuberculosis: a systematic review and meta-analysis.”**  
 Gregory J. Fox, Simone E. Barry, Warwick J. Britton and Guy B. Marks. *Eur Respir J* 2013; 41: 140–156.

Table 2 of this article was originally published with an incorrect column heading: the column headed “Contacts with active TB” should have the heading “Contacts with latent TB infection”. The corrected table is presented below and the online version of this article has been amended to reflect this correction.

TABLE 2 Prevalence of latent tuberculosis (TB) infection in the contacts of TB patients in low–middle- and high-income countries

|                              | Included studies | Contacts with latent TB infection | Contacts screened | Proportion % | 95% CI    | $\tau^2$ | $I^2$ |
|------------------------------|------------------|-----------------------------------|-------------------|--------------|-----------|----------|-------|
| <b>Low–middle income</b>     |                  |                                   |                   |              |           |          |       |
| All ages                     |                  |                                   |                   |              |           |          |       |
| All <sup>#</sup>             | 76               | 35788                             | 60557             | 51.5         | 47.1–55.8 | 0.58     | 98.9  |
| Index patient smear positive | 51               | 19003                             | 33875             | 52.9         | 48.9–56.8 | 0.32     | 97.7  |
| Index patient with HIV       | 12               | 1138                              | 2376              | 45.7         | 38.7–52.9 | 0.22     | 90.9  |
| Index patient XDR/MDR-TB     | 6                | 431                               | 684               | 61.3         | 39.1–79.6 | 1.21     | 95.2  |
| Household contacts           | 73               | 23577                             | 49512             | 45.4         | 40.7–50.2 | 0.69     | 98.4  |
| All close contacts           | 73               | 23577                             | 49643             | 45.3         | 40.6–50.1 | 0.69     | 98.4  |
| Contacts with HIV infection  | 8                | 123                               | 247               | 53.5         | 40.6–66.0 | 0.36     | 71.4  |
| ≤5 yrs                       | 33               | 5102                              | 12389             | 35.5         | 30.3–41.1 | 0.42     | 96.6  |
| 5–14 yrs                     | 21               | 6587                              | 11123             | 53.1         | 42.0–63.9 | 1.05     | 98.6  |
| ≥15 yrs                      | 10               | 11980                             | 14057             | 65.3         | 35.5–86.5 | 3.80     | 99.6  |
| <b>High income</b>           |                  |                                   |                   |              |           |          |       |
| All ages                     |                  |                                   |                   |              |           |          |       |
| All <sup>¶</sup>             | 92               | 79511                             | 284505            | 28.1         | 24.2–32.4 | 0.99     | 99.5  |
| Index patient smear positive | 34               | 25910                             | 78784             | 34.8         | 27.6–42.7 | 0.96     | 99.1  |
| Index patient with HIV       | 1                | 131                               | 363               | 36.0         | 31.2–41.0 | 0.00     |       |
| Index patient XDR/MDR-TB     | 2                | 287                               | 554               | 52.6         | 49.5–55.7 | 0.00     |       |
| Household contacts           | 33               | 20960                             | 67175             | 30.0         | 21.3–40.5 | 1.80     | 99.6  |
| All close contacts           | 29               | 20213                             | 68738             | 28.0         | 18.9–39.4 | 1.96     | 99.6  |
| Casual contacts only         | 7                | 5779                              | 27383             | 18.7         | 11.8–28.5 | 0.52     | 99.4  |
| Contacts with HIV infection  | 3                | 28                                | 151               | 25.0         | 11.4–46.4 | 0.53     | 86.6  |
| ≤5 yrs                       | 17               | 2093                              | 6900              | 16.3         | 9.2–27.0  | 1.73     | 99.2  |
| 5–14 yrs                     | 10               | 1407                              | 4871              | 18.4         | 11.8–27.5 | 0.64     | 98.4  |
| ≥15 yrs                      | 8                | 6221                              | 12633             | 41.9         | 30.5–54.2 | 0.50     | 99.4  |

Data are presented as n, unless otherwise stated. XDR: extensively drug resistant; MDR: multidrug resistant. World Bank Income Gross National Income per capita: low income (≤\$1,005 per yr); lower-middle income (\$1,006 to \$3,975 per yr); upper-middle income (\$3,976 to \$12,275 per yr); high income (≥\$12,276 per yr) [22]. <sup>#</sup>: [9, 32, 34, 36–39, 41–43, 48, 49, 52, 55, 57–60, 62–67, 69, 71, 73, 74, 77–79, 81, 83–89, 91, 93–95, 97–101, 185–187, 194–196, 199–201 203–215]; <sup>¶</sup>: [10, 28, 30, 31, 102, 103, 105, 107, 109–111, 115, 116, 119, 121–125, 128–138, 142–145, 147–157, 159–184, 188, 189, 193, 202, 216–233].

# Author Queries

*Journal:* ERJ

*Manuscript:* ERJ-00708-2012-CORRE

No Queries
